# Supplementary material for: A Flexible Supercapacitor Based on Niobium Carbide MXene and Sodium Anthraquinone-2-Sulfonate Composite Electrode
Source: MDPI journal article supplement (doi:10.3390/mi14081515), 2023-07-28
Supplement: s1 [file s1]

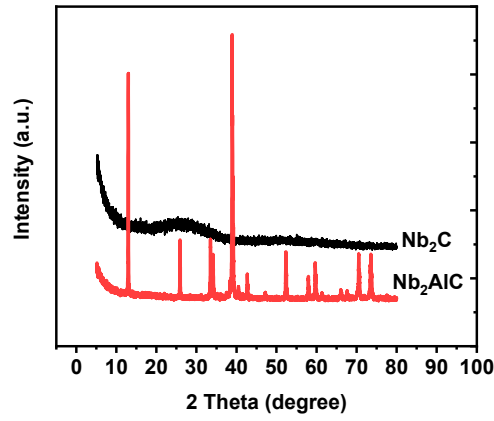

**Figure S1.** XRD patterns of Nb<sub>2</sub>C nanosheets and Nb<sub>2</sub>AlC powder.

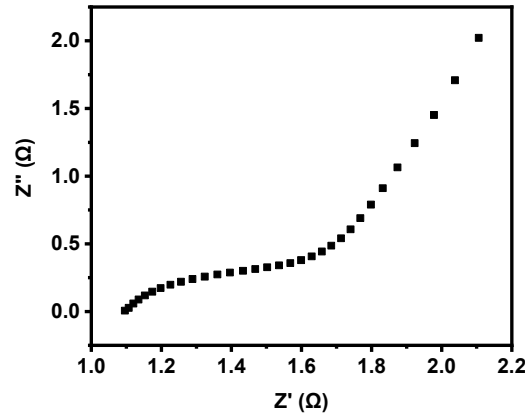

**Figure S2.** Nyquist plots of the Nb<sub>2</sub>C–AQS nanocomposite-modified electrode in 10 mmol·L<sup>-1</sup> K<sub>4</sub>Fe(CN)<sub>6</sub> and K<sub>4</sub>Fe(CN)<sub>6</sub> (molar ratio 1:1) from 1–10 mHz at 10 mV sinusoidal signal.

The areal specific capacitance ( $C_s$ ) of the electrodes were obtained from the CV curves [1]:

$$C_A = \left( \frac{1}{2} \int idV \right) / (A \times \Delta V \times \nu)$$

where  $C_A$  represents the specific capacitance (F·cm<sup>-2</sup>),  $\int idV$  is the integrated area of the CV curve,  $\Delta V$  is the scanning potential window (V), and  $\nu$  is the scan rate (V·s<sup>-1</sup>). The CV curves consist of oxidation and reduction curves corresponding to charge/discharge processes. Thus, the integrated area of the nearly symmetrical CV curves (multiplied by 1/2) was used to calculate the specific capacitance.

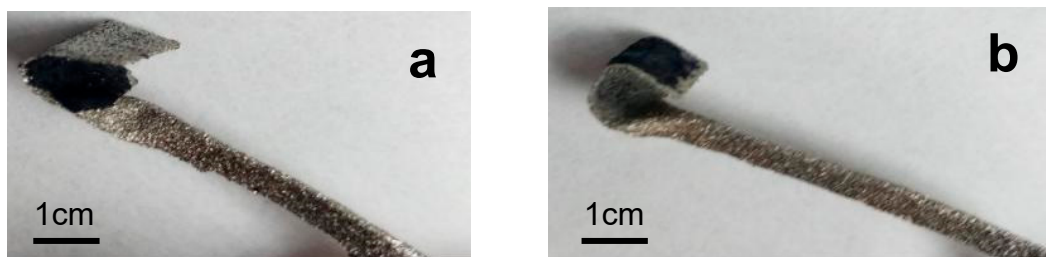

**Figure S3.** Two bending modes of the Nb<sub>2</sub>C–AQS based SC: (a) concavely bent, and (b) convexly bent.

The specific capacitance of the resulting SCs was also derived from the GCD curves of the Nb<sub>2</sub>C–AQS composite:

$$C_A = T / (\Delta V \times i \times 2),$$

where  $C_A$  represents the specific capacitance ( $\text{F} \cdot \text{cm}^{-2}$ ),  $T$  represents the discharge time of a cycle of constant current charge and discharge,  $\Delta V$  is the scanning potential window (V), and  $i$  is the current density ( $\text{A} \cdot \text{cm}^{-2}$ ).

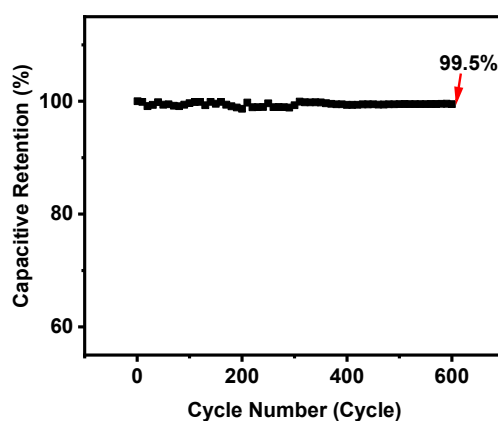

**Figure S4.** Capacitance retention at a current density of  $15 \text{ mA cm}^{-2}$  for the Nb<sub>2</sub>C–AQS based micro-SC in  $0.1 \text{ mol L}^{-1} \text{ Na}_2\text{SO}_4$ .

#### Reference:

- 1 Wang, G.X.; Babaahmadi, V.; He, N.; Liu, Y.; Pan, Q.; Montazer, M.; Gao, W. Wearable supercapacitors on polyethylene terephthalate fabrics with good wash fastness and high flexibility. *Journal of Power Sources*, 2017; 367(nov.1):34-41.
